# Supplementary material
Source: PubMed Central journal article supplement (PMC2878011)
Supplement: supp_M109.078501_jbc.M109.078501-1.pdf [file supp_M109.078501_jbc.M109.078501-1.pdf]

**Table.1**

| <b>plasmids</b>                  | <b>insert</b>   | <b>Sequences</b>                                                                                                                                                                                  |
|----------------------------------|-----------------|---------------------------------------------------------------------------------------------------------------------------------------------------------------------------------------------------|
| pCMV-MYC tag-3C<br>(Clontech)    | mWASH-FL-MYC    | <i>FORWARD:</i> TATAGAATTCatgacaccggtgaagaccagtgct<br><i>REVERSE:</i> TATAAAGCTTcttaggactcccagtcctct                                                                                              |
|                                  | mWASH-WCA-MYC   | <i>FORWARD:</i> TATAGAATTCccagtaccccacagccaccgat<br><i>REVERSE:</i> TATAAAGCTTcttaggactcccagtcctct                                                                                                |
|                                  | mWASH-WC-MYC    | <i>FORWARD:</i> TATAGAATTCccagtaccccacagccaccgat<br><i>REVERSE:</i> TATAAAGCTTcattgtctctgccggctctg                                                                                                |
| pcDNA3.1-HA/FLAG<br>(invitrogen) | mWASH-FL-HA     | <i>FORWARD:</i> TATAGAATTCatgacaccggtgaagaccagtgct<br><i>REVERSE:</i> TATAGATATCttaggactcccagtcctctcat                                                                                            |
|                                  | mWASH-FL-FLAG   | <i>FORWARD:</i> TATAGAATTCatgacaccggtgaagaccagtgct<br><i>REVERSE:</i> TATAGATATCttaggactcccagtcctctcat                                                                                            |
| pEGFP-C1 (Clontech)              | mWASH-FL-GFP    | <i>FORWARD:</i> TATAGAGCTCacaccggtgaagaccca<br><i>REVERSE:</i> TATAGGTACCttaggactcccagtcctctcat                                                                                                   |
|                                  | mWASH-FLWH2-GFP | <i>FORWARD:</i> TATAGAGCTCacaccggtgaagaccca<br><i>REVERSE:</i> TATACCCGGGactggagggtcaaccact<br><i>FORWARD:</i> TATACCCGGGaaggagecgaactggagaag<br><i>REVERSE:</i> TATAGGTACCttaggactcccagtcctctcat |
|                                  | mWASH-FLAAC-GFP | <i>FORWARD:</i> TATAGAGCTCacaccggtgaagaccca<br><i>REVERSE:</i> TATAGGTACCcattgtctctgccggctctg                                                                                                     |
| pGBKT7 (Clontech)                | N-Terminal-WASH | <i>FORWARD:</i> TATAGAATTCatgacaccggtgaagaccagtgct<br><i>REVERSE:</i> TATAGTCGACaatgccagggcccaatccg                                                                                               |
| pHAT2<br>(Ref. 17)               | C-terminal-WASH | <i>FORWARD:</i> TATAGAATTCatgagtcacatcaccatcacatgttc<br><i>REVERSE:</i> TATAAAGCTTcttaggactcccagtcctct                                                                                            |
