# Supplementary material
Source: PubMed Central journal article supplement (PMC2878011)

a)

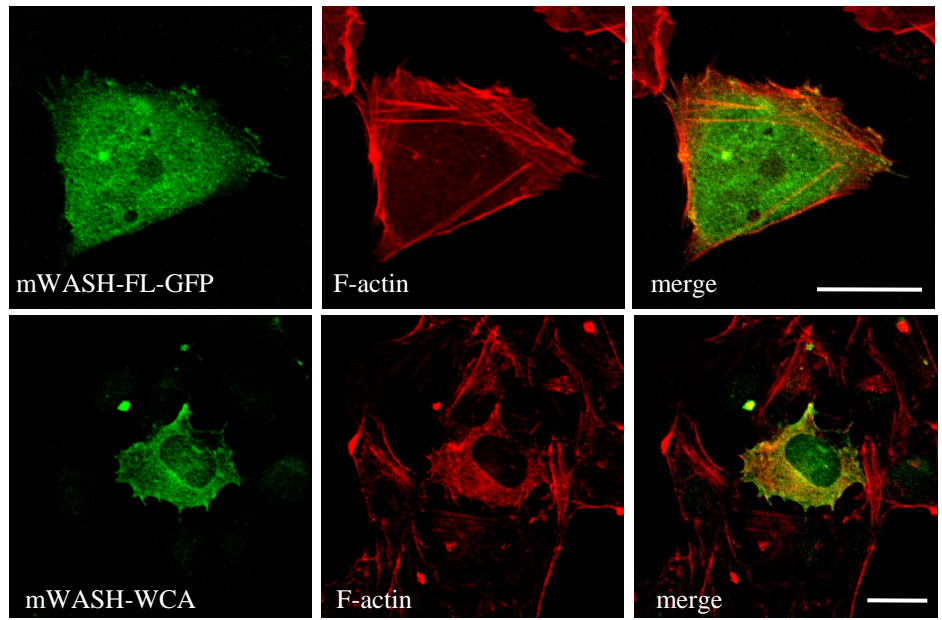

Supplement: supp_M109.078501_jbc.M109.078501-2.pdf [file supp_M109.078501_jbc.M109.078501-2.pdf]

a)

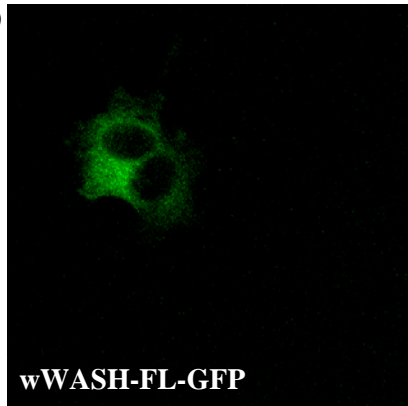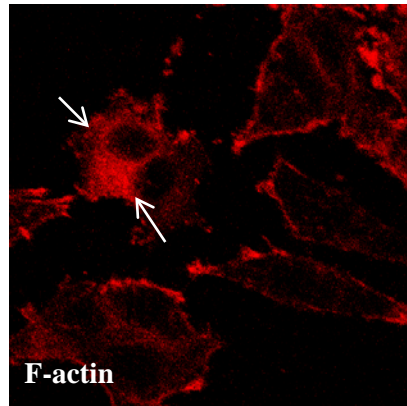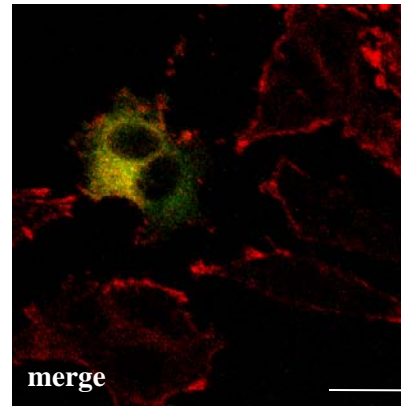

NGF TIME

+ 24h

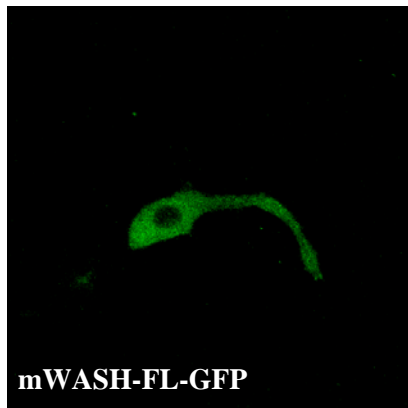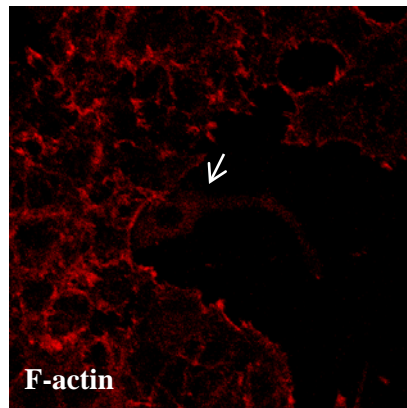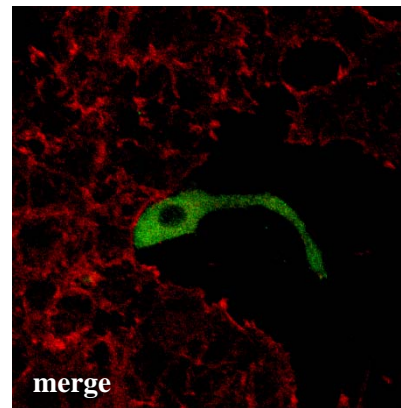

+ 24h

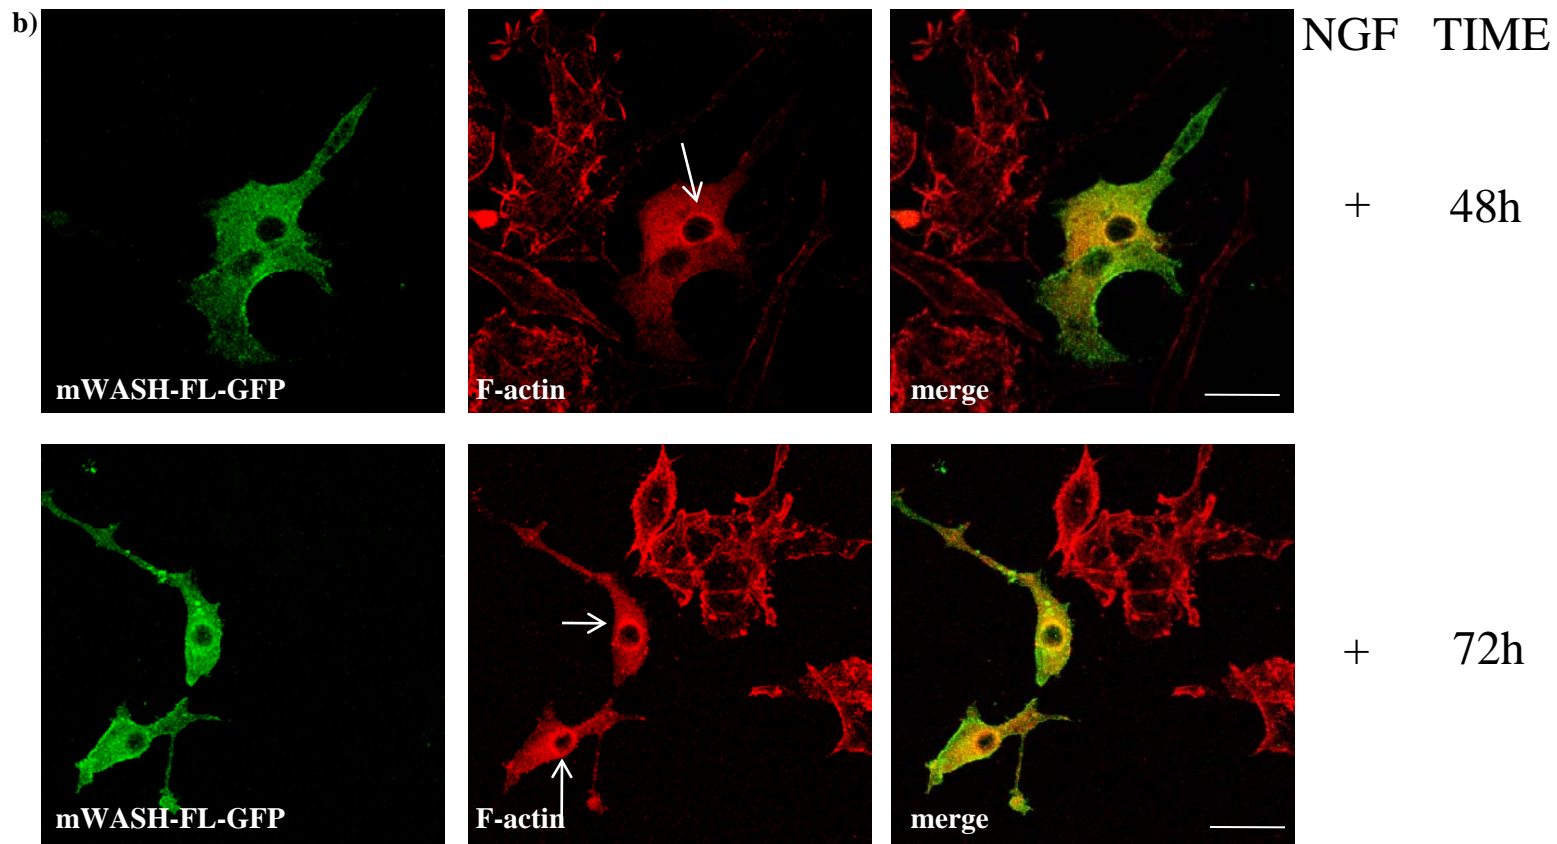

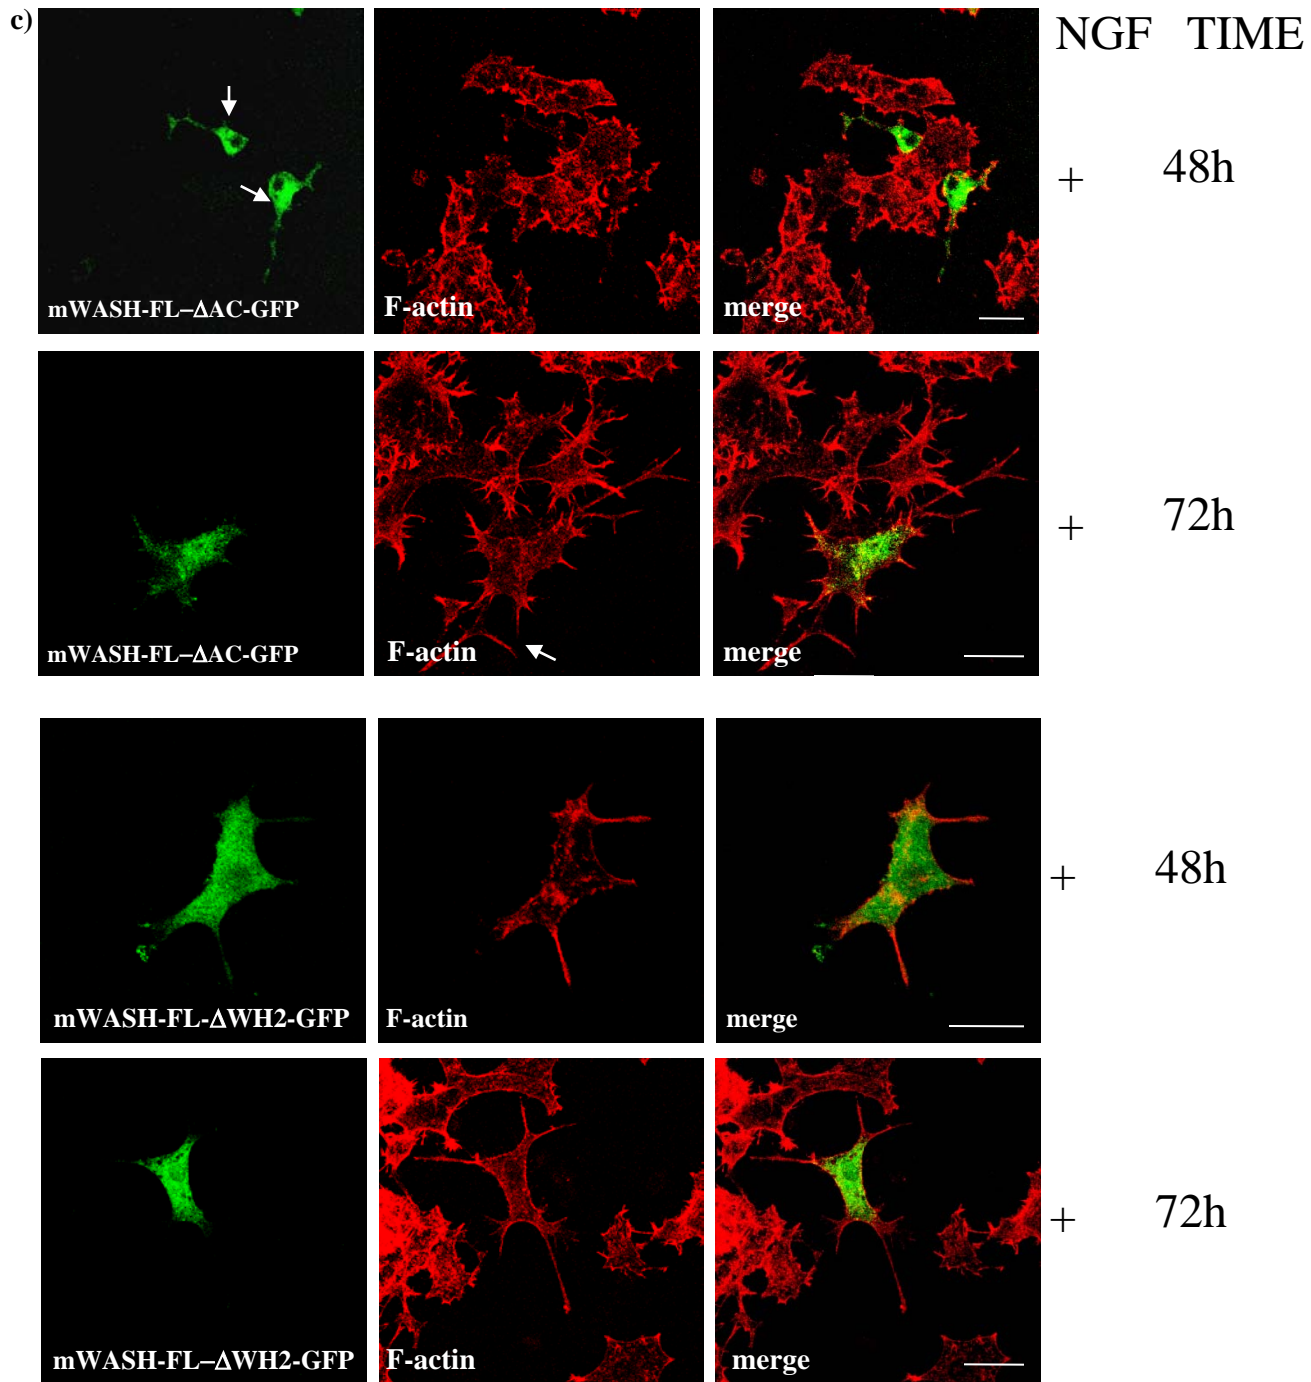

Supplement: supp_M109.078501_jbc.M109.078501-3.pdf [file supp_M109.078501_jbc.M109.078501-3.pdf]

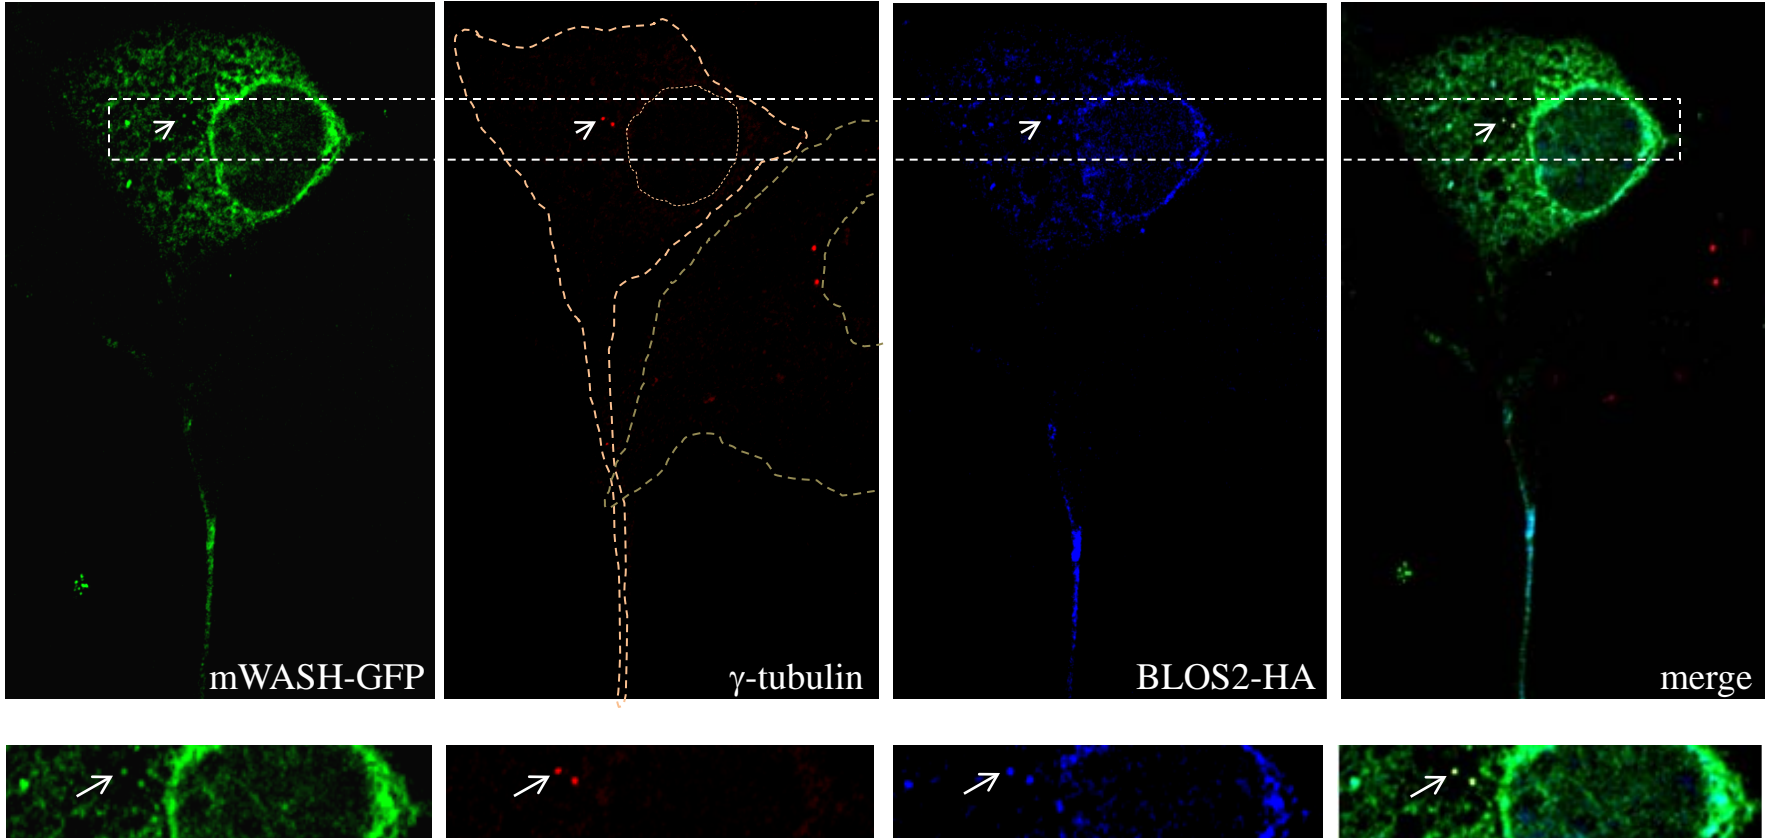

MEF

Supplement: supp_M109.078501_jbc.M109.078501-4.pdf [file supp_M109.078501_jbc.M109.078501-4.pdf]

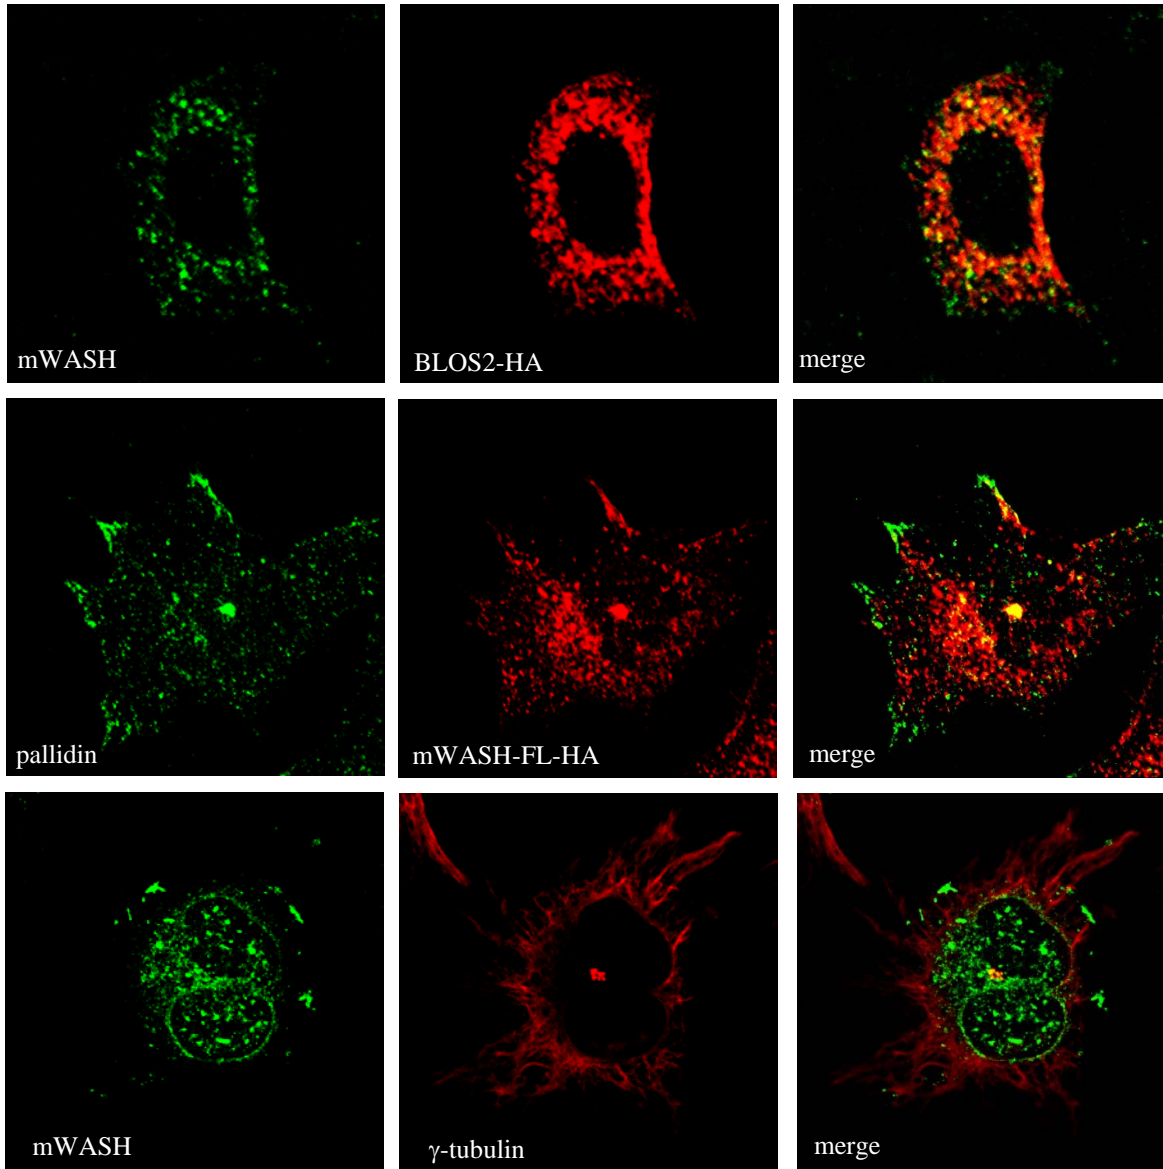

Supplement: supp_M109.078501_jbc.M109.078501-5.pdf [file supp_M109.078501_jbc.M109.078501-5.pdf]

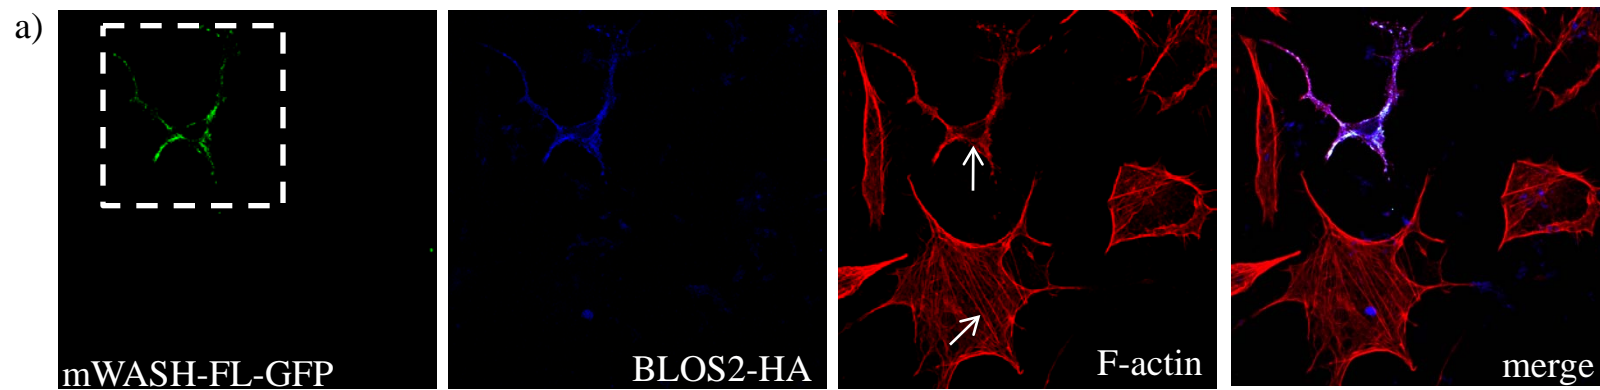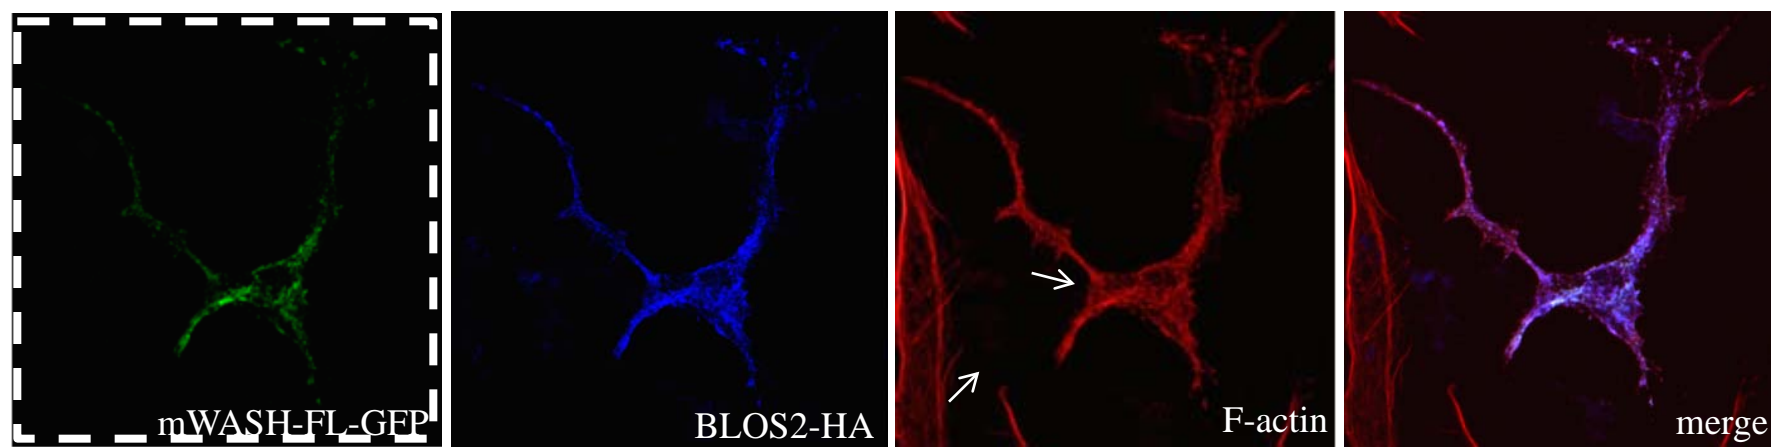

Supplement: supp_M109.078501_jbc.M109.078501-6.pdf [file supp_M109.078501_jbc.M109.078501-6.pdf]
